## THE USE OF CITRATED BANKED BLOOD FOR OPEN-HEART SURGERY

NAZIH ZUHDI, M.D., BILLY MCCOLLOUGH, M.D., JOHN CAREY, M.D.,  
ALLEN GREER, M.D.

ONE of the most vexing problems in extracorporeal circulatory systems has been the provision of an adequate supply of fresh donor blood. It is the purpose of this paper to report on the use of routinely collected and processed banked blood in hypothermic extracorporeal circulation, using the double helical system.<sup>1</sup>

### METHOD

ACD banked blood as collected and processed by the Oklahoma City Community Blood Bank was circulated through the double helical reservoir oxygenator-sigmamotor pump (fig. 1).<sup>1,4</sup> Donor blood was drawn by vacuum through silicone-coated donor sets into silicone-coated glass bottles containing 120 ml. ACD

This study was received from the Cardiovascular Section, Mercy Hospital, Oklahoma City, and accepted for publication June 2, 1960. The authors' address is 430 Northwest 12th Street, Oklahoma City 3, Oklahoma.

solution, with the flow rate regulated at 9-100 ml. per minute. The blood was processed according to National Institute of Health approved blood banking techniques.

*In vitro* studies included determinations of hematocrit, white blood count, platelet count, plasma hemoglobin, and plasma sodium, potassium, and chloride made before the blood was subjected to the double helical system; after thirty minutes; after sixty minutes of pump operation at a flow of 250 ml. a minute for a 500 ml. reservoir. Temperature of the blood was maintained at either 25 C. or 37 C.

Clinical studies included determinations of hematocrit and plasma hemoglobin on each bottle of banked blood used; on each patient before perfusion, at varying intervals during perfusion, and at the end of the perfusion; and on blood drawn from the double helical reservoir at the end of cardiopulmonary bypass. Tests to measure mechanical fragility and os-

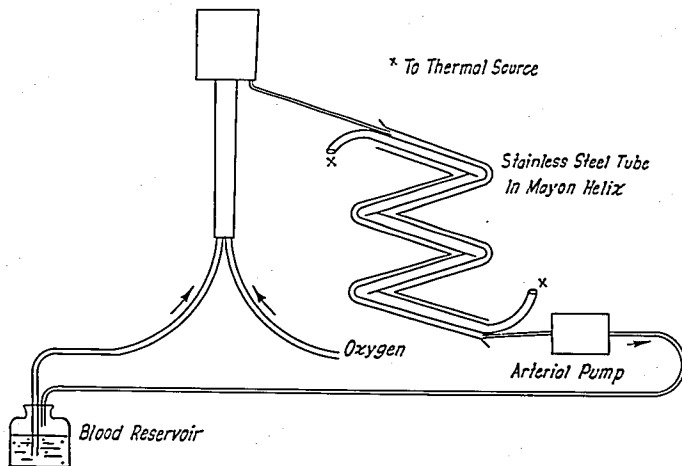

FIG. 1. Diagram of system used both experimentally and clinically.

matic fragility of blood are being conducted and some preliminary results will be reported. In all patients reported in this series, 5 per cent dextrose in water was used as the priming fluid for the heart-lung machine,<sup>1</sup> and ACD banked blood to replace that lost during surgery.

TECHNIQUES

All determinations were done in duplicate. The techniques used included: Hematocrit determinations: microhematocrit capillary tubes, and international microhematocrit centrifuge and reader. Platelet counts: direct count method, using a modified Deese-Ecker diluting fluid.<sup>5</sup> Plasma hemoglobin: modified benzidine method as described by Crosby and

Furth.<sup>6</sup> Plasma sodium and potassium levels: Coleman flame photometer attached to Coleman Junior spectrophotometer.<sup>7</sup>

Plasma chloride levels: method of Schales and Schales.<sup>8</sup> Quantitative osmotic fragility: modification of the method described by Ham.<sup>5</sup> Mechanical fragility: modification of the method of Ham and Shen.<sup>9</sup>

RESULTS

*In vitro* studies show that citrated banked blood, stored up to five days may be circulated through a system such as that described above without undergoing significant changes in the factors measured (Tables 1 and 2). The low chloride levels reported may be explained by

TABLE 1

IN VITRO STUDIES ON BLOOD CIRCULATED AT 25 C. THROUGH THE DOUBLE-HELICAL OXYGENATOR AND SIGMAMOTOR PUMP AT A FLOW RATE OF 250 ML. A MINUTE WITH A 500 ML. RESERVOIR

| Bottle No. | Days Old | Hematocrit |         |         | White Blood Cells |         |         | Platelets per mm. <sup>3</sup> |         |         |
|------------|----------|------------|---------|---------|-------------------|---------|---------|--------------------------------|---------|---------|
|            |          | Base Line  | 30 min. | 60 min. | Base Line         | 30 min. | 60 min. | Base Line                      | 30 min. | 60 min. |
| F5766      | 1        | 44         | 42      | 41      | 7,600             | 7,000   | 6,450   | 212,000                        | 200,000 | 196,000 |
| F5742      | 1        | 40         | 37      | 36      | 11,300            | 10,900  | 10,600  | 206,000                        | 186,000 | 178,000 |
| Average    |          | 42         | 39      | 38      | 9,450             | 8,950   | 8,500   | 209,000                        | 193,000 | 187,000 |
| F6281      | 2        | 41         | 38      | 36      | 8,100             | 7,700   | 7,350   | 203,000                        | 189,000 | 171,000 |
| F6222      | 2        | 39         | 37      | 36      | 9,600             | 9,000   | 8,750   | 208,000                        | 197,000 | 186,000 |
| F5935      | 2        | 45         | 44      | 42      | 6,000             | 5,500   | 5,300   | 196,000                        | 187,000 | 182,000 |
| Average    |          | 41         | 39      | 38      | 7,900             | 7,400   | 7,100   | 202,000                        | 191,000 | 179,000 |
| F6215      | 3        | 43         | 41      | 39      | 8,600             | 7,900   | 7,300   | 147,000                        | 125,000 | 118,000 |
| F6176      | 3        | 45         | 43      | 41      | 7,650             | 7,400   | 7,100   | 139,000                        | 130,000 | 118,000 |
| F5902      | 3        | 44         | 42      | 41      | 6,900             | 6,750   | 6,700   | 143,000                        | 129,000 | 118,000 |
| Average    |          | 43         | 40      | 38      | 7,600             | 7,300   | 7,000   | 154,000                        | 140,000 | 128,000 |
| F6194      | 4        | 39         | 39      | 35.5    | 7,450             | 6,800   | 6,150   | 139,000                        | 124,000 | 111,000 |
| F6161      | 4        | 45         | 43      | 42.5    | 7,400             | 7,050   | 6,800   | 109,000                        | 103,000 | 98,000  |
| F5866      | 4        | 42         | 41      | 40      | 5,450             | 5,200   | 4,950   | 117,000                        | 110,000 | 106,000 |
| Average    |          | 42         | 40      | 39.3    | 6,800             | 6,350   | 5,950   | 121,000                        | 112,000 | 105,000 |
| F6153      | 5        | 39.5       | 36      | 33.5    | 6,300             | 5,850   | 5,400   | 107,000                        | 98,000  | 86,000  |
| F6122      | 5        | 53         | 49      | 45      | 6,750             | 6,700   | 6,200   | 99,000                         | 87,000  | 83,000  |
| F5101      | 5        | 42         | 38      | 37      | 5,300             | 5,000   | 4,850   | 202,000                        | 186,000 | 168,000 |
| Average    |          | 44.8       | 41      | 38.5    | 6,150             | 5,850   | 5,450   | 136,000                        | 123,000 | 112,000 |
| F5864      | 7        | 40         | 35      | 33      | 4,100             | 4,000   | 3,500   | 12,000                         | 8,600   | 7,000   |
| F5867      | 7        | 43         | 38      | 36      | 3,900             | 3,500   | 3,000   | 15,000                         | 7,000   | 4,500   |
| Average    |          | 41         | 36      | 34      | 4,000             | 3,700   | 3,200   | 13,000                         | 7,800   | 5,700   |
| F5834      | 8        | 39         | 36.5    | 35.5    | 3,850             | 3,400   | 3,300   | 8,000                          | 4,000   | 3,000   |
| F5827      | 8        | 41         | 39      | 37      | 3,200             | 2,500   | 2,000   | 7,500                          | 3,500   | 2,000   |
| F5835      | 8        | 44         | 42      | 41      | 2,500             | 2,000   | 1,500   | 5,000                          | 3,000   | 1,800   |
| Average    |          | 41         | 39      | 37.8    | 3,200             | 2,600   | 2,000   | 6,800                          | 3,500   | 2,200   |

TABLE 1—Continued

| Bottle No. | Days Old | Plasma Hemoglobin—mg. % |         |         | Sodium—mEq./l. |         |         | Potassium—mEq./l. |         |         | Chloride—mEq./l. |         |         |
|------------|----------|-------------------------|---------|---------|----------------|---------|---------|-------------------|---------|---------|------------------|---------|---------|
|            |          | Base Line               | 30 min. | 60 min. | Base Line      | 30 min. | 60 min. | Base Line         | 30 min. | 60 min. | Base Line        | 30 min. | 60 min. |
| F5766      | 1        | 20.3                    | 39.1    | 53.4    | 138            | 140     | 142     | 5.6               | 5.7     | 6.0     | 70               | 70      | 72      |
| F5742      | 1        | 44.5                    | 62.3    | 80.1    | 138            | 136     | 137     | 4.6               | 4.4     | 4.6     | 70               | 69.5    | 70.4    |
| Average    |          | 32.4                    | 50.7    | 66.7    | 138            | 138     | 139     | 5.1               | 5.0     | 5.3     | 70               | 69.8    | 71.4    |
| F6281      | 2        | 9.3                     | 18.4    | 33.2    | 135            | 133     | 130     | 6.5               | 6.3     | 6.6     | 72.5             | 73      | 75.1    |
| F6222      | 2        | 10.0                    | 14.3    | 17.8    | 138            | 137     | 137     | 6.3               | 6.2     | 6.3     | 69.8             | 68.4    | 69.5    |
| F5935      | 2        | 12.5                    | 35.0    | 40.0    | 127            | 125     | 127     | 4.4               | 4.6     | 4.7     | 67.3             | 66.8    | 66.6    |
| Average    |          | 10.6                    | 22.5    | 30.3    | 133            | 131     | 131     | 5.7               | 5.7     | 5.8     | 69.8             | 69.4    | 70.1    |
| F6215      | 3        | 11.0                    | 19.1    | 26.7    | 128            | 129     | 130     | 5.8               | 5.7     | 5.9     | 77               | 79.5    | 76.8    |
| F6176      | 3        | 7.2                     | 13.9    | 19.4    | 136            | 139     | 137     | 4.4               | 4.6     | 4.7     | 74               | 74.9    | 73.7    |
| F5902      | 3        | 9.0                     | 89.2    | 106.0   | 118            | 120     | 119     | 4.6               | 4.9     | 5.1     | 72.8             | 73.1    | 73.2    |
| F5720      | 3        | 22.3                    | 65.5    | 89.3    | 135            | 135     | 136     | 6.2               | 6.4     | 6.5     | 66               | 73      | 76      |
| Average    |          | 12.3                    | 46.9    | 60.3    | 129            | 130     | 130     | 5.2               | 5.4     | 5.5     | 72.5             | 75.1    | 74.9    |
| F6194      | 4        | 6.5                     | 19.9    | 27.6    | 125            | 123     | 127     | 6.2               | 6.5     | 6.4     | 69.8             | 69.8    | 70.0    |
| F6161      | 4        | 11.5                    | 16.3    | 18.0    | 134            | 135     | 135     | 5.4               | 5.3     | 5.3     | 79               | 79.7    | 78      |
| F5866      | 4        | 8.0                     | 48.0    | 58.0    | 125            | 127     | 128     | 4.9               | 5.1     | 5.2     | 69.8             | 69.8    | 70.0    |
| Average    |          | 8.6                     | 28.0    | 34.5    | 128            | 128     | 130     | 5.5               | 5.6     | 5.6     | 72.8             | 73.1    | 72.6    |
| F6153      | 5        | 10.3                    | 15.4    | 19.2    | 137            | 134     | 138     | 6.9               | 6.7     | 7.1     | 73.2             | 73      | 73.1    |
| F6122      | 5        | 8.9                     | 13.7    | 16.0    | 138            | 140     | 138     | 7.1               | 7.3     | 7.2     | 75               | 73.4    | 74      |
| F5101      | 5        | 15.7                    | 58.9    | 98.5    | 134            | 135     | 137     | 7.1               | 7.6     | 8.1     | 71               | 72      | 75      |
| Average    |          | 11.6                    | 29.3    | 44.5    | 136            | 136     | 137     | 7.0               | 7.2     | 7.4     | 73               | 72.8    | 74      |
| F5864      | 7        | 7.5                     | 137.5   | 200.0   | 135            | 136     | 136     | 8.7               | 9.8     | 10.1    | 70               | 75      | 77      |
| F5867      | 7        | 10.0                    | 50.0    | 75.0    | 139            | 140     | 138     | 8.1               | 8.7     | 9.2     | 68               | 67      | 69      |
| Average    |          | 8.7                     | 93.7    | 137.7   | 137            | 138     | 137     | 8.4               | 9.2     | 9.6     | 69               | 71      | 73      |
| F5834      | 8        | 7.5                     | 33.4    | 45.7    | 133            | 134     | 135     | 8.1               | 8.5     | 8.8     | 72               | 73      | 73      |
| F5827      | 8        | 12.5                    | 20.0    | 45.5    | 128            | 130     | 129     | 9.1               | 9.5     | 9.6     | 71               | 73.6    | 72      |
| F5835      | 8        | 12.5                    | 22.5    | 39.8    | 128            | 127     | 129     | 9.0               | 9.3     | 9.5     | 74               | 73      | 73      |
| Average    |          | 10.8                    | 25.3    | 43.6    | 129            | 130     | 131     | 8.7               | 9.1     | 9.3     | 72               | 73.1    | 72      |

the dilution of the whole blood with 20 ml. of the citrate solution. *In vitro* changes at 25 and 37 C. at the end of one hour are summarized in table 3.

*In vivo* studies on patients undergoing open-heart surgery with hypothermic perfusion using the system and techniques described above showed an average decrease in hemato-

TABLE 2

*IN VITRO* STUDIES ON BLOOD CIRCULATED AT 37 C. THROUGH THE DOUBLE-HELICAL OXYGENATOR AND SIGMAMOTOR PUMP AT A FLOW RATE OF 250 ML. A MINUTE WITH A 500 ML. RESERVOIR

| Bottle No. | Days Old | Hematocrit |         |         | White Blood Cells |         |         | Platelets per mm. <sup>3</sup> |         |         |
|------------|----------|------------|---------|---------|-------------------|---------|---------|--------------------------------|---------|---------|
|            |          | Base Line  | 30 min. | 60 min. | Base Line         | 30 min. | 60 min. | Base Line                      | 30 min. | 60 min. |
| F6448      | 1        | 46         | 42      | 40      | 8,600             | 8,000   | 7,850   | 207,000                        | 193,000 | 180,000 |
| F6411      | 2        | 40.5       | 37.5    | 35.5    | 9,650             | 9,000   | 8,300   | 201,000                        | 183,000 | 161,000 |
| F6315      | 3        | 46         | 42.5    | 40      | 7,400             | 6,900   | 6,100   | 151,000                        | 126,000 | 101,000 |
| F6255      | 4        | 42.5       | 36      | 34      | 5,950             | 5,400   | 5,050   | 113,000                        | 103,000 | 87,000  |
| F6207      | 5        | 42         | 39      | 35      | 6,400             | 5,300   | 5,000   | 99,000                         | 76,000  | 54,000  |

TABLE 2—Continued

| Bottle No. | Days Old | Plasma Hemoglobin—mg. % |         |         | Sodium—mEq./l. |         |         | Potassium—mEq./l. |         |         | Chloride—mEq./l. |         |         |
|------------|----------|-------------------------|---------|---------|----------------|---------|---------|-------------------|---------|---------|------------------|---------|---------|
|            |          | Base Line               | 30 min. | 60 min. | Base Line      | 30 min. | 60 min. | Base Line         | 30 min. | 60 min. | Base Line        | 30 min. | 60 min. |
| F6448      | 1        | 6.5                     | 37.5    | 52.0    | 131            | 133     | 132     | 4.6               | 4.6     | 4.7     | 71               | 70.9    | 71.3    |
| F6411      | 2        | 9.0                     | 16.5    | 22.0    | 129            | 130     | 128     | 5.0               | 5.1     | 4.9     | 68.4             | 68.9    | 69.3    |
| F6315      | 3        | 8.0                     | 21.5    | 28.0    | 128            | 130     | 131     | 6.7               | 6.5     | 6.7     | 70.1             | 70.1    | 71      |
| F6255      | 4        | 7.5                     | 16.5    | 19.0    | 130            | 135     | 134     | 6.2               | 6.3     | 6.3     | 73.0             | 72.4    | 72.9    |
| F6207      | 5        | 11.5                    | 21.5    | 39.5    | 129            | 127     | 127     | 7.0               | 6.9     | 7.1     | 70.1             | 72      | 71.5    |

crit of only 2.3 per cent and an average rise in plasma hemoglobin of only 18.9 mg. per cent. The maximum rise in plasma hemoglobin was 45.8 mg. per cent (Table 4). Osmotic and mechanical fragility tests on red blood cells during two human perfusions with the 5 per cent dextrose in water primed heart-lung machine and the use of banked citrated blood to replace that lost during surgery are summarized in table 5.

DISCUSSION

Freshly drawn heparinized blood<sup>9, 10, 11</sup> has been advocated for open-heart surgery; fresh to secure the least altered blood and heparinized to avoid citrate poisoning and over loading with fluids. However, citrated banked blood obtained in routine fashion would do away with special programs for blood recruitments currently in progress.

Our studies indicate that banked blood stored up to five days maintains most of its measured elements and does not change markedly when subjected to our double helical system. Postoperative blood loss compared favorably with the blood loss observed when fresh blood was used. The possible decrease of the

life span of the red blood cell is currently being investigated but the degree and frequency of postoperative anemia observed does not seem to be unusual.

The first clinical instance of possible citrate poisoning during open-heart surgery was described by Dennis and associates, in 1951,<sup>11</sup> when late in the repair of an ostium primum defect, the force of the heart beats were noted to be weak following the use of citrated blood for substitution. However, multiple factors entered into the picture and could have led to the inability of the heart to sustain a strong beat. Bunker<sup>9</sup> stated that citrated blood should not be used during open-heart surgery or hypothermia because of the danger of citrate poisoning. The deleterious effects of the use of banked citrated blood during hypothermic perfusion were not encountered in our series of patients weighing from 10 kg. to 72 kg. and using up to 5,000 ml. of blood in one procedure. The amount of citrate fluid used in each pint of blood should be taken into consideration in the fluid balance sheet and accounted for during the computation of the 24 hour fluid requirements. The use of banked citrated blood during hypothermic perfusion is advocated only when used in conjunction with the system as described; we have not studied other systems.

TABLE 3

SUMMARY OF CHANGES IN BLOOD AT THE END OF ONE HOUR RUN AT 25 C. AND 37 C.

|                   | Average Change at 25 C.* | Average Change at 37 C.* |
|-------------------|--------------------------|--------------------------|
| Hematocrit        | -4.4%                    | -6.5%                    |
| White blood cells | -850 cells               | -1,100 cells             |
| Platelet count    | -17,500/cu. mm.          | -38,000/cu. mm.          |
| Plasma hemoglobin | +46.1 mg. %              | +23.6 mg. %              |
| Plasma sodium     | +1 mEq./l.               | +1 mEq./l.               |
| Plasma potassium  | +0.5 mEq./l.             | +0.02 mEq./l.            |
| Plasma chloride   | +1.3 mEq./l.             | +0.7 mEq./l.             |

\* - indicates a decrease and + an increase.

SUMMARY

Routinely collected and processed banked blood may be used successfully in an extracorporeal circulatory system using low flow rates as made possible by hypothermic perfusion. Blood banked for as many as five days may be used without significant changes occurring in hematocrit, white blood count, plate-

TABLE 4  
STUDIES ON PATIENTS UNDERGOING HYPOTHERMIC PERFUSION WITH THE 5% DEXTROSE IN WATER  
PRIMED DOUBLE-HELICAL RESERVOIR HEART-LUNG MACHINE

| Patient          | Age in Years | Wt. in Kg. | Flow Rate | Length of Perfusion (min.) | Blood Bottle No. | Age in Days | Hematocrit |                | Plasma Hemoglobin - mg. % |                |
|------------------|--------------|------------|-----------|----------------------------|------------------|-------------|------------|----------------|---------------------------|----------------|
|                  |              |            |           |                            |                  |             | Base Line  | Post Perfusion | Base Line                 | Post Perfusion |
| L. J.            | 24           | 12.55      | 300       | 26                         |                  |             | 41         | 36.5           | 11.0                      | 20.0           |
|                  |              |            |           |                            | F6069            | 1           | 44         |                | 18.5                      |                |
|                  |              |            |           |                            | F6072            | 1           | 43         | 8.0            |                           |                |
|                  |              |            |           |                            | Blood from helix |             |            | 37             | 12.5                      |                |
| G. B.            | 9            | 25.55      | 600       | 88                         |                  |             | 32         | 34.5           | 9.5                       | 17.8           |
|                  |              |            |           |                            | F6081            | 1           | 40         |                | 26.5                      |                |
|                  |              |            |           |                            | F6082            | 1           | 43         | 15.0           |                           |                |
|                  |              |            |           |                            | F6075            | 1           | 41.5       | 19.7           |                           |                |
|                  |              |            |           |                            | F6074            | 1           | 42         | 12.0           |                           |                |
|                  |              |            |           |                            | F6086            | 1           | 44         | 8.6            |                           |                |
| Blood from helix |              |            | 35        | 20.0                       |                  |             |            |                |                           |                |
| J. O.            | 24           | 12.71      | 300       | 42                         |                  |             | 38         | 33.5           | 11.7                      | 21.3           |
|                  |              |            |           |                            | F6171            | 2           | 42         |                | 9.6                       |                |
|                  |              |            |           |                            | F6182            | 2           | 40         | 15.9           |                           |                |
|                  |              |            |           |                            | Blood from helix |             |            | 34             | 25.7                      |                |
| J. D.            | 10           | 39.0       | 800       | 62                         |                  |             |            |                | 12.0                      |                |
|                  |              |            |           |                            | F6166            | 6           | 43         |                | 9.5                       |                |
|                  |              |            |           |                            | F6378            | 1           | 41         | 8.6            |                           |                |
|                  |              |            |           |                            | F6376            | 2           | 44         |                |                           |                |
|                  |              |            |           |                            | Blood from helix |             |            |                | 23.5                      |                |
| J. W.            | 21           | 35.05      | 700       | 82                         |                  |             | 40         | 36             | 11.6                      | 23.1           |
|                  |              |            |           |                            | F6507            | 4           | 51         |                | 9.5                       |                |
|                  |              |            |           |                            | F6535            | 3           | 38         | 11.6           |                           |                |
|                  |              |            |           |                            | F6491            | 5           | 42         | 8.7            |                           |                |
|                  |              |            |           |                            | F6537            | 3           | 36         | 10.4           |                           |                |
|                  |              |            |           |                            | Blood from helix |             |            | 35             | 19.7                      |                |
| N. D.            | 46           | 46.80      | 1,000     | 33                         |                  |             | 40         | 38             | 17.9                      | 34.3           |
|                  |              |            |           |                            | F5922            | 1           | 36         |                | 19.3                      |                |
|                  |              |            |           |                            | F5921            | 1           | 39         | 23.4           |                           |                |
| Blood from helix |              |            | 37        | 36.1                       |                  |             |            |                |                           |                |
| C. S.            | 54           | 70.87      | 1,500     | 189                        |                  |             | 47         | 41             | 13.9                      | 67.7           |
|                  |              |            |           |                            | F6614            | 2           | 42         |                | 17.3                      |                |
|                  |              |            |           |                            | F6611            | 2           | 41         | 8.1            |                           |                |
|                  |              |            |           |                            | F6641            | 2           | 41         | 12.3           |                           |                |
|                  |              |            |           |                            | F6604            | 2           | 43         | 9.6            |                           |                |
|                  |              |            |           |                            | F6608            | 2           | 40         | 14.3           |                           |                |
|                  |              |            |           |                            | F6533            | 4           | 44         | 23.6           |                           |                |
|                  |              |            |           |                            | F6535            | 4           | 38         | 16.7           |                           |                |
|                  |              |            |           |                            | F6540            | 4           | 44         | 11.2           |                           |                |
|                  |              |            |           |                            | F6663            | 1           | 40         | 13.4           |                           |                |
|                  |              |            |           |                            | Blood from helix |             |            | 42             | 70.3                      |                |
| E. L.            | 35           | 39.78      | 800       | 61                         |                  |             | 32         | 33.5           | 9.8                       | 34.0           |
|                  |              |            |           |                            | F6807            | 4           | 51         |                | 8.3                       |                |
|                  |              |            |           |                            | F6809            | 4           | 40         | 15.6           |                           |                |
|                  |              |            |           |                            | F6803            | 4           | 41         | 21.3           |                           |                |
| R. H.            | 7½           | 22.6       | 450       | 81                         |                  |             | 36.5       | 31             | 8.9                       | 26.7           |
| T. N.            | 7            | 21.0       | 400       | 31                         |                  |             | 41.5       | 33.5           | 9.45                      | 17.8           |

TABLE 5

RBC FRAGILITY STUDIES ON PATIENTS UNDERGOING HYPOTHERMIC PERFUSION WITH THE 5% DEXTROSE IN WATER PRIMED DOUBLE HELICAL RESERVOIR HEART-LUNG MACHINE

| Patient | Specimen                                                        | % Saline    | Osmotic Fragility |      |      |      | Mechanical Fragility<br>Plasma Hemoglobin<br>after Agitation—<br>mg. % |
|---------|-----------------------------------------------------------------|-------------|-------------------|------|------|------|------------------------------------------------------------------------|
|         |                                                                 |             | 0.85              | 0.45 | 0.30 | 0.00 |                                                                        |
| J. W.   | Control                                                         | % hemolysis | 0                 | 3.7  | 97.6 | 100  | 75.6                                                                   |
|         | Patient—Base Line                                               | % hemolysis | 0                 | 1.55 | 90.1 | 100  | 69.0                                                                   |
|         | Patient—1 hour perfusion                                        | % hemolysis | 0                 | 2.1  | 96.3 | 100  | 76.1                                                                   |
|         | Patient—50 min. after end of perfusion—perfusion lasted 82 min. | % hemolysis | 0                 | 2.35 | 94.3 | 100  | 75.4                                                                   |
| E. L.   | Patient—Base Line                                               | % hemolysis | 0                 | 1.4  | 88.5 | 100  |                                                                        |
|         | Patient—at end of perfusion—perfusion lasted 61 min.            | % hemolysis | 0                 | 2.75 | 90.6 | 100  |                                                                        |

let count, plasma hemoglobin and plasma sodium, potassium and chloride concentrations. Comparison of studies made on blood at 25 C. with blood at 37 C. seem to indicate that it is the low flow rate that makes possible the use of banked blood. The system described has been successfully used on 30 patients undergoing open-heart surgery.

The technical determinations were made by Mrs. Betty Blackburn.

REFERENCES

- Zuhdi, N., McCollough, B., Carey, J. and Greer, A.: Double helical reservoir heart-lung machine for hypothermic perfusion-primed with 5% dextrose in water, In publication.
- Zuhdi, N., Greer, A., Kimmell, G. Montroy, J., Redmond, R., Donnell, J., Carey, J., Geigerman, D., and Krieger, C.: Clinical study of hypothermic perfusion, *J. Oklahoma M. A.* 52: 671, 1959.
- Zuhdi, N., Greer, A., Montroy, J., Carey, J. and McCollough, B.: Hypothermic Total Body Cardiopulmonary Bypass. Report of 19 consecutive cases. *J. Oklahoma M. A.* 53: 83, 1960.

- Zuhdi, N., Kimmell, G., Montroy, J., Carey, J. and Greer, A.: A system for hypothermic perfusion. *J. Thor. Surg.* 39: 629, 1960.
- Ham, Thomas Hale: *A Syllabus of Laboratory Examinations in Clinical Diagnosis*, ed. 6. 1956, p. 51-63, 161-183, 183-164.
- Crosby, W. H. and Furth, F. W.: Modification of benzidine method for measurement of hemoglobin in plasma and urine, *Blood* 11: 380, 1958.
- Operating Directions for Model 21. Coleman-Flame Photometer. Bulletin D-240, Coleman Inst. Incorporated, p. 28-28, 30-32.
- Hawk, Oser, Summerson: *Practical Physiological Chemistry*, ed. 13., p. 626.
- Bunker, J.: Citric Acid Intoxication, the Sixth Congress of the International Society of Blood Transfusion, September 1956, p. 45.
- Abbott, J., Cooley, D., DeBakey, M. and Ragland, J.: Storage of blood for open heart operations. *Surgery* 44: 698, 1958.
- Dennis, C., Spreng, D., Nelson, G., Karlson, K., Nelson, R., Thomas, J., Eder, W., and Varco, R.: Development of a pump-oxygenator to replace the heart and lungs; an apparatus applicable to human patients, *Ann. Surg.* 134: 709, 1951.
